# Supplementary material
Source: bioRxiv or medRxiv preprint supplement (https://medrxiv.org/highwire/filestream/75966/field_highwire_adjunct_files/0/2020.04.05.20054700-1.pdf)
Supplement: Supplementary file [file 2020.04.05.20054700-1.pdf]

# **Mapping the Burden of COVID-19 in the United States**

## **Supplementary Figures**

Ian F. Miller<sup>1,\*</sup>, Alexander D. Becker<sup>1</sup>, Bryan T. Grenfell<sup>1,2</sup>, and C. Jessica E. Metcalf<sup>1,2</sup>

<sup>1</sup>Department of Ecology and Evolutionary Biology, Princeton University

<sup>2</sup>Woodrow Wilson School of Public Affairs, Princeton University

\*ifmiller@princeton.edu

N transmissison scenarios identifying  
county as being at or above 90% quantile  
of per capita hospitalizations

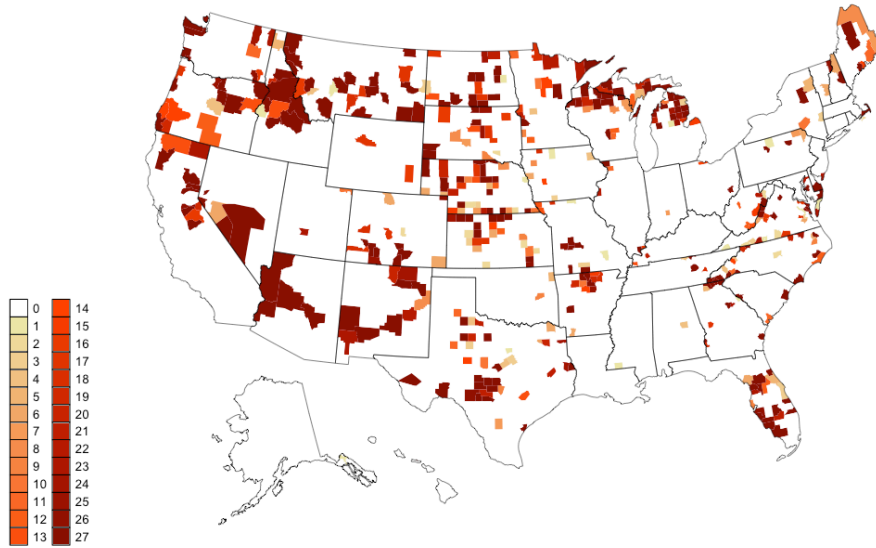

**Figure S1:** Counties at or above 90% quantile of per capita hospitalizations

For each of 27 transmission scenarios, we simulated our model and calculated the burden of COVID-19 infection. Colors indicate the number of transmission scenarios in which each county was identified as being at or above the 90% quantile of per capita hospitalizations.

N transmission scenarios identifying  
county as being at or above 90% quantile  
of hospitalizations per hospital bed

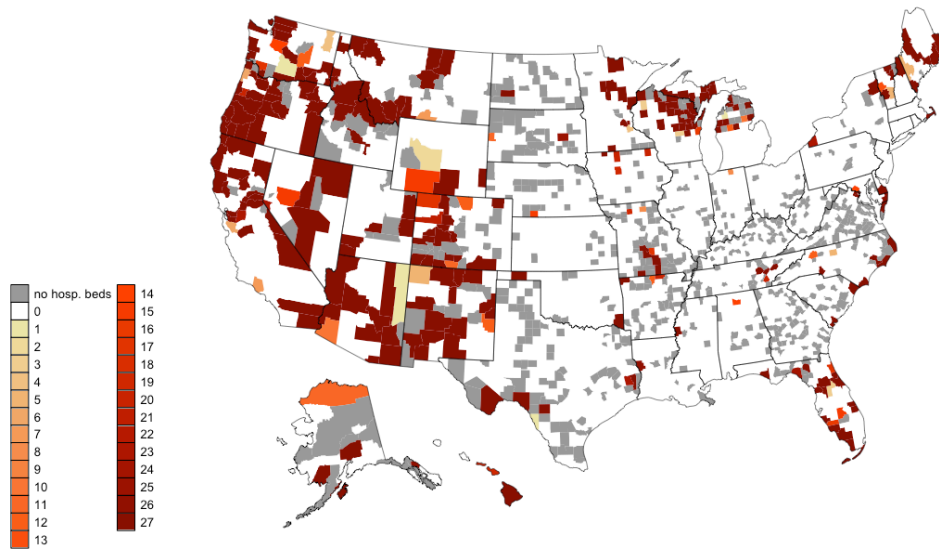

**Figure S2:** Counties at or above 90% quantile of hospitalizations per hospital bed  
For each of 27 transmission scenarios, we simulated our model and calculated the burden of COVID-19 infection. Colors indicate the number of transmission scenarios in which each county was identified as being at or above the 90% quantile of hospitalization per hospital bed. Counties without hospital beds are colored grey.

N transmission scenarios identifying  
county as being at or above 90% quantile  
of per capita ICU admissions

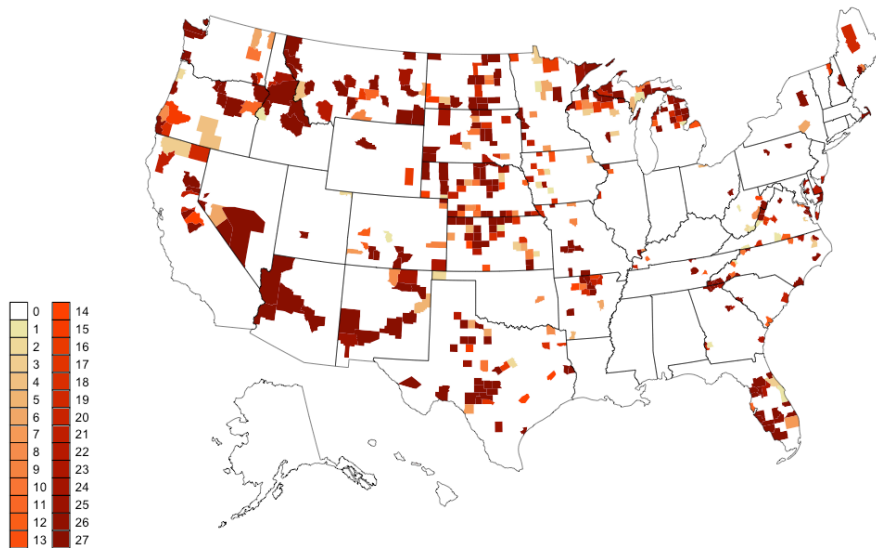

**Figure S3:** Counties at or above 90% quantile of per capita ICU admissions  
For each of 27 transmission scenarios, we simulated our model and calculated the burden of COVID-19 infection. Colors indicate the number of transmission scenarios in which each county was identified as being at or above the 90% quantile of ICU admissions per capita.

N transmission scenarios identifying county as being at or above 90% quantile of ICU admissions per ICU bed

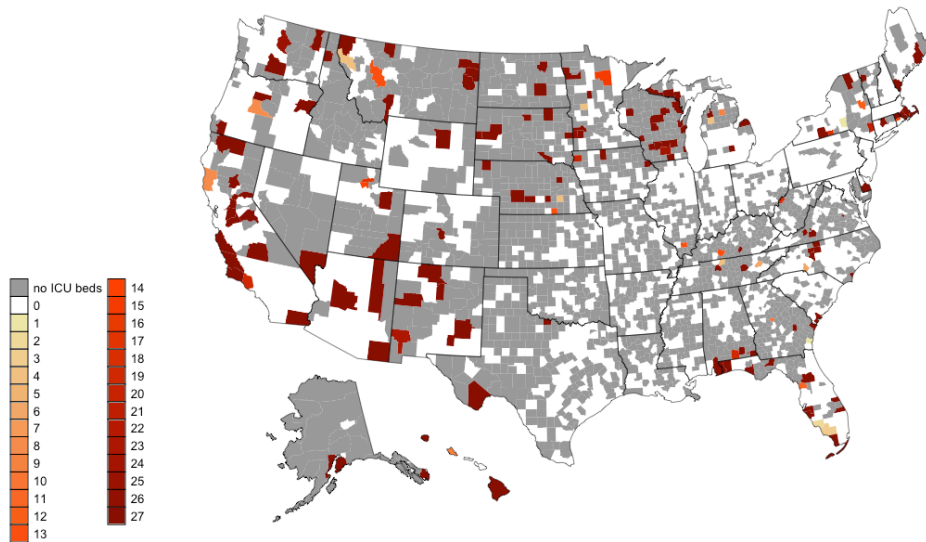

**Figure S4:** Counties at or above 90% quantile of per capita ICU admissions per ICU bed  
For each of 27 transmission scenarios, we simulated our model and calculated the burden of COVID-19 infection. Colors indicate the number of transmission scenarios in which each county was identified as being at or above the 90% quantile of ICU admissions per ICU bed. Counties without ICU beds are colored grey.
